# Supplementary material
Source: PubMed Central journal article supplement (PMC3898176)
Supplement: NIHMS546640-supplement-TableS1.pdf [file NIHMS546640-supplement-TableS1.pdf]

**Table S1. Vector-borne diseases of importance based upon health and economical impact.**

| Disease                            | Pathogen                                          | Vector                                                                                  | Estimated Number of Affected Individuals (Per Year) | Mortality | References                                                                                                                                                                                                                                                                                                                                                                                                                                         |
|------------------------------------|---------------------------------------------------|-----------------------------------------------------------------------------------------|-----------------------------------------------------|-----------|----------------------------------------------------------------------------------------------------------------------------------------------------------------------------------------------------------------------------------------------------------------------------------------------------------------------------------------------------------------------------------------------------------------------------------------------------|
| 1. Malaria                         | <i>Plasmodium spp.</i>                            | <i>Anopheles gambiae</i>                                                                | 216 million                                         | 655, 000  | 1. <a href="http://www.who.int/malaria/world_malaria_report_2011/en/">http://www.who.int/malaria/world_malaria_report_2011/en/</a>                                                                                                                                                                                                                                                                                                                 |
| 2. Lymphatic filariasis            | <i>Wuchereria bancrofti</i><br><i>Brugia spp.</i> | <i>Culex spp.</i><br><i>Anopheles spp.</i><br><i>Aedes spp.</i><br><i>Mansonia spp.</i> | 120 million                                         | ---       | 1. <a href="http://www.cdc.gov/parasites/lymphaticfilariasis/gen_info/faqs.html">http://www.cdc.gov/parasites/lymphaticfilariasis/gen_info/faqs.html</a>                                                                                                                                                                                                                                                                                           |
| 3. Dengue fever                    | Dengue virus                                      | <i>Aedes aegypti</i><br><i>Aedes albopictus</i>                                         | 50 million                                          | 22,000    | 1. <a href="http://www.cdc.gov/Dengue/epidemiology/index.html">http://www.cdc.gov/Dengue/epidemiology/index.html</a><br>2. <a href="http://www.who.int/csr/disease/dengue/impact/en/">http://www.who.int/csr/disease/dengue/impact/en/</a>                                                                                                                                                                                                         |
| 4. Leishmaniasis                   | <i>Leishmania spp.</i>                            | <i>Lutzomyia longipalpis</i>                                                            | 12-15 million                                       | 60, 000   | 1. <a href="http://www.who.int/vaccine_research/diseases/vector/en/index3.html">http://www.who.int/vaccine_research/diseases/vector/en/index3.html</a>                                                                                                                                                                                                                                                                                             |
| 5. Chagas disease                  | <i>Trypanosoma cruzi</i>                          | <i>Rhodnius prolixus</i>                                                                | 10 million                                          | > 10,000  | 1. <a href="http://www.who.int/mediacentre/factsheets/fs340/en/">http://www.who.int/mediacentre/factsheets/fs340/en/</a>                                                                                                                                                                                                                                                                                                                           |
| 6. Yellow fever                    | Yellow fever virus                                | <i>Aedes aegypti</i>                                                                    | 200,000                                             | 30, 000   | 1. <a href="http://www.who.int/mediacentre/factsheets/fs100/en/">http://www.who.int/mediacentre/factsheets/fs100/en/</a>                                                                                                                                                                                                                                                                                                                           |
| 7. Lyme Borreliosis                | <i>Borrelia burgdorferi</i>                       | <i>Ixodes spp.</i>                                                                      | 110,000 **                                          | 1 **      | 1. <a href="http://www.euro.who.int/__data/assets/pdf_file/0006/96819/E89522.pdf">http://www.euro.who.int/__data/assets/pdf_file/0006/96819/E89522.pdf</a><br>2. <a href="http://health.nytimes.com/health/guides/disease/lyme-disease/risk-factors.html">http://health.nytimes.com/health/guides/disease/lyme-disease/risk-factors.html</a><br>3. <a href="http://www.cdc.gov/lyme/stats/index.html">http://www.cdc.gov/lyme/stats/index.html</a> |
| 8. West Nile neuroinvasive disease | West Nile virus                                   | <i>Culex quinquefasciatus</i>                                                           | *                                                   | *         | 1. <a href="http://www.who.int/mediacentre/factsheets/fs354/en/">http://www.who.int/mediacentre/factsheets/fs354/en/</a><br>2. <a href="http://www.cdc.gov/ncidod/dvbid/westnile/qa/cases.htm">http://www.cdc.gov/ncidod/dvbid/westnile/qa/cases.htm</a>                                                                                                                                                                                           |

\* Estimates are not available

\*\* Estimates in the United States and Europe

--- Not applicable
